# Supplementary material
Source: MDPI journal article supplement (https://www.mdpi.com/2073-4352/11/11/1425)
Supplement: s1 [file s1]

# Preparation of Flower-Like Nickel-Based Bimetallic Organic Framework Electrodes for High-Efficiency Hybrid Supercapacitors

Di Jiang <sup>1</sup>, Chuanying Wei <sup>2</sup>, Ziyang Zhu <sup>1</sup>, Xiaohui Xu <sup>1,\*</sup>, Min Lu <sup>1,\*</sup> and Guangsheng Wang <sup>3,\*</sup>

<sup>1</sup> School of Chemical Engineering, Northeast Electric Power University, Jilin 132000, China

<sup>2</sup> College of Marine Engineering, Jimei University, Xiamen 361000, China

<sup>3</sup> School of Chemistry, Beihang University, Beijing 100191, China

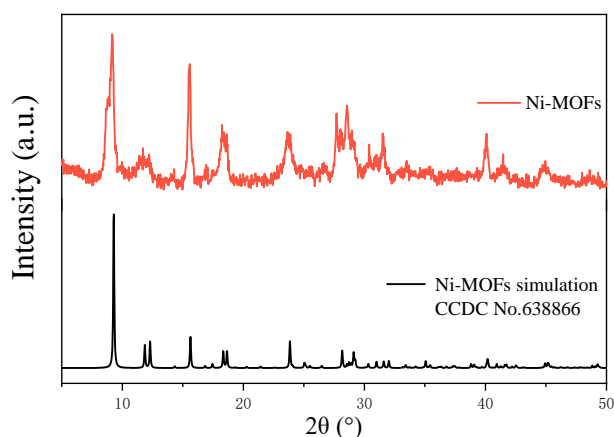

**Figure S1.** The XRD spectra of Ni-MOFs and Ni-MOFs simulation (CCDC No.638866).

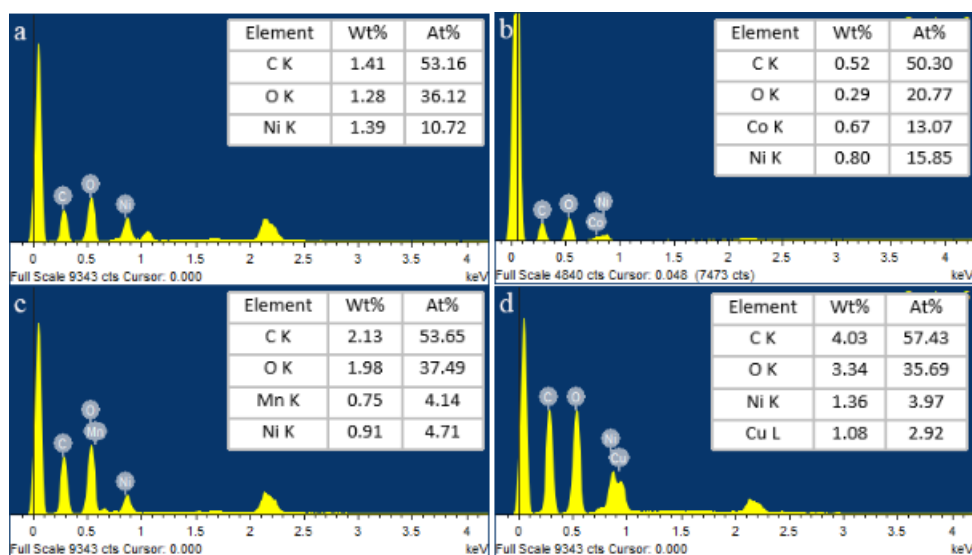

**Figure S2.** The EDS spectra of (a) Ni-MOFs, (b) NiCo-MOFs, (c) NiMn-MOFs and (d) NiCu-MOFs.

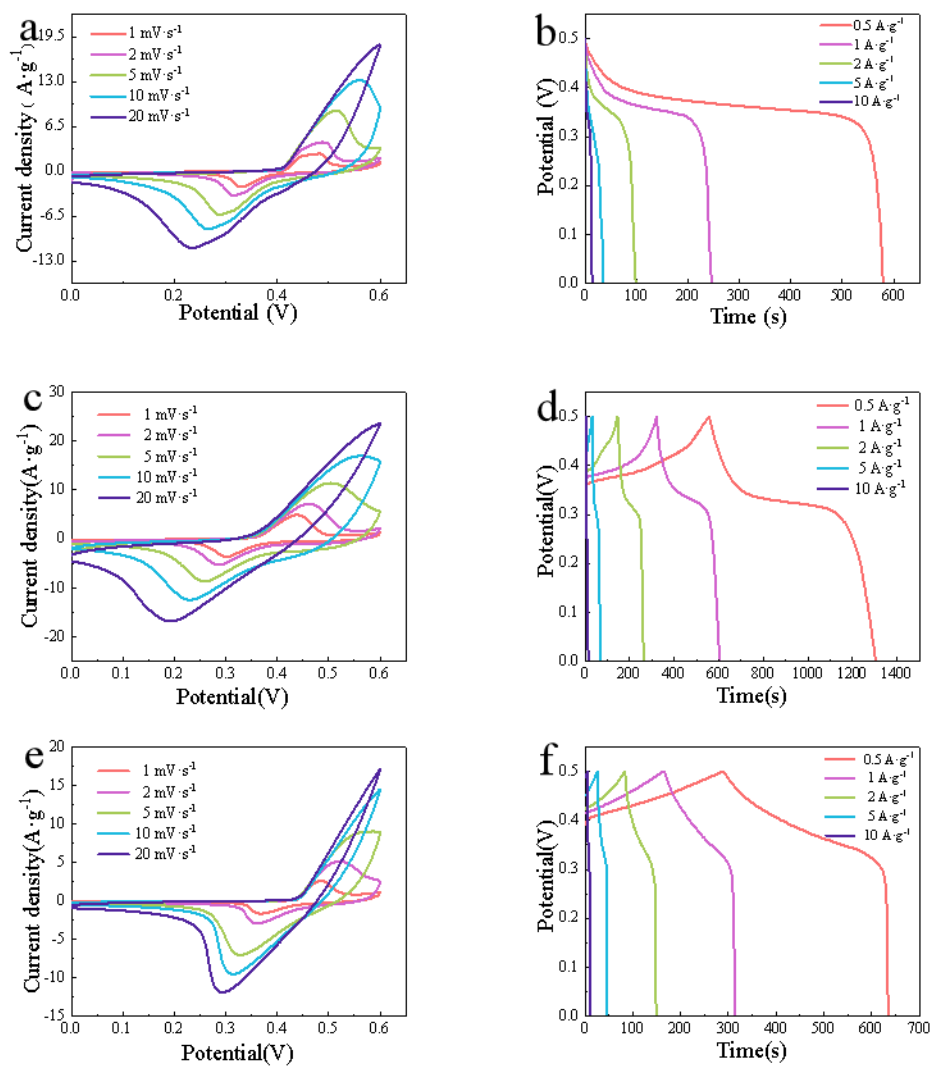

**Figure S3.** CV curves of (a) Ni-MOFs; (c) NiMn-MOFs and (e) NiCu-MOFs at scan rates of 1–20  $\text{mV} \cdot \text{s}^{-1}$ ; GCD curves of (b) Ni-MOFs, (d) NiMn-MOFs and (f) NiCu-MOFs at different current densities.

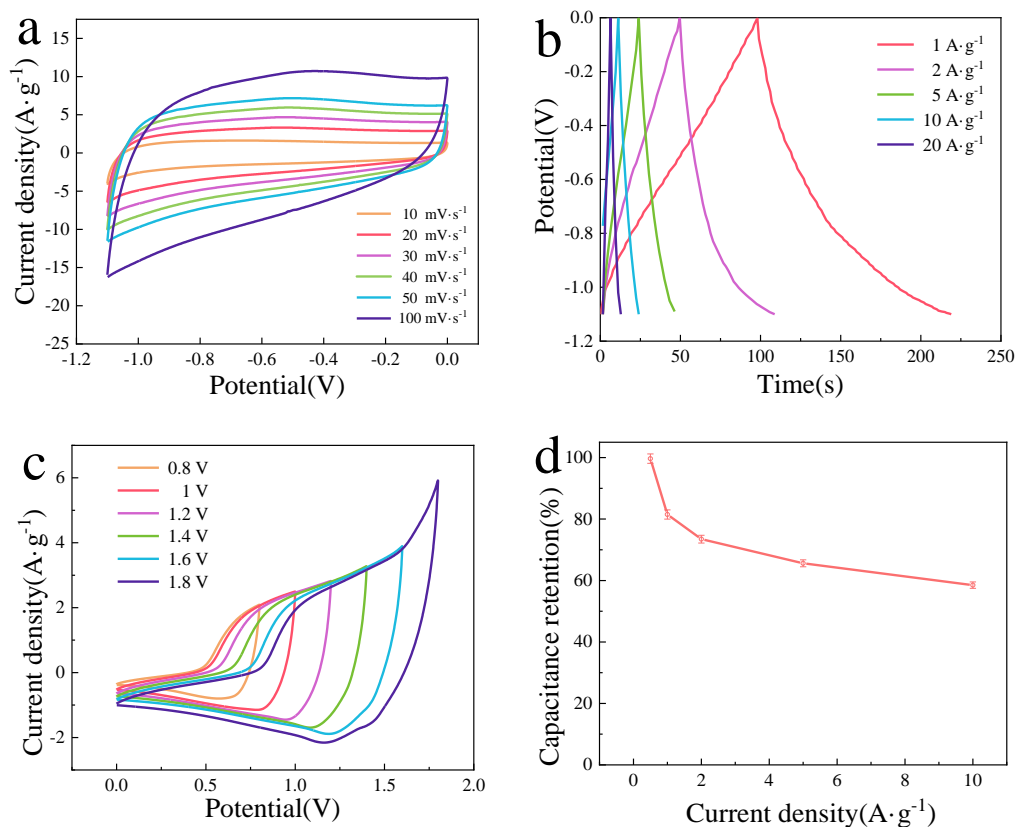

**Figure S4.** (a) CV and (b) GCD curves of AC measured in the 2M KOH; (c) CV curves of the NiCo-MOFs//AC HSCs tested at a scan rate of 50 mV·s<sup>-1</sup> with different voltage windows; (d) rate performance of the NiCo-MOFs//AC HSCs.

**Table S1.** Specific surface area of the four synthesized samples

| Samples                                                  | Ni-MOFs    | NiCo-MOFs  | NiMn-MOFs  | NiCu-MOFs |
|----------------------------------------------------------|------------|------------|------------|-----------|
| specific surface area (m <sup>2</sup> ·g <sup>-1</sup> ) | 28.31±0.03 | 16.11±0.05 | 15.57±0.01 | 14.97±0.1 |

**Table S2.** Comparison of electrochemical performance between the NiCo-MOFs and previous reports.

| Materials       | Current density       | Specific capacitance    | Cycling performance | Energy density(Wh·kg <sup>-1</sup> ) | Power density(W·kg <sup>-1</sup> ) | Ref.      |
|-----------------|-----------------------|-------------------------|---------------------|--------------------------------------|------------------------------------|-----------|
| Ni-MOF          | 1 A·g <sup>-1</sup>   | 804 F·g <sup>-1</sup>   | 37.6%, 5000 cycles  | 31.5                                 | 800                                | 26        |
| Ni-based MOF    | 1 A·g <sup>-1</sup>   | 726 F·g <sup>-1</sup>   | 94.6%, 1000 cycles  | 16.5                                 | 2078                               | 28        |
| Pillared Ni-MOF | 1 A·g <sup>-1</sup>   | 522 F·g <sup>-1</sup>   | 98%, 16000 cycles-  | -                                    | -                                  | 29        |
| Co-BPDC MOF     | 1 A·g <sup>-1</sup>   | 179.2 F·g <sup>-1</sup> | 5.7%, 1000 cycles   | 31.4                                 | 5640                               | 19        |
| Ni/Zn-MOFs      | 1.3 A·g <sup>-1</sup> | 548 F·g <sup>-1</sup>   | -                   | -                                    | -                                  | 35        |
| NiCo-MOFs       | 0.5 A·g <sup>-1</sup> | 882 F·g <sup>-1</sup>   | 90.1%, 3000 cycles  | 18.33                                | 400                                | This work |
| NiMn-MOFs       | 0.5 A·g <sup>-1</sup> | 747 F·g <sup>-1</sup>   | 64.5%,3000cycles    | -                                    | -                                  |           |
| NiCu-MOFs       | 0.5 A·g <sup>-1</sup> | 345 F·g <sup>-1</sup>   | 27.8%,3000 cycles   | -                                    | -                                  |           |
